# Supplementary material for: Crystallisation in printed droplets: understanding crystallisation of d-mannitol polymorphs
Source: Royal Society of Chemistry journal article supplement (doi:10.1039/c8ce01780h), 2019-01-01
Supplement: c8ce01780h1.pdf [file c8ce01780h1.pdf]

## Supplementary information for

### Confinement in printed droplets: effect on crystallisation of d-mannitol polymorphs

Asma Buanz\*, Monica Gurung, Simon Gaisford

UCL School of Pharmacy, University College London, 29-39 Brunswick Square, London, WC1N 1AX, UK

Email: asma.buanz.11@ucl.ac.uk

#### Content:

1. Experimental: Imaging, evaporation rate determination and contact angle measurement.
2. Crystallographic Data of D-mannitol polymorphs (**Table S1**)
3. Raman spectra from crystals formed in printed drops of up to 200 nL (0.2  $\mu$ L) on (a) glass and (b) aluminium foil (**Fig. S1**)
4. Calculated PXRD patterns for d-mannitol forms  $\alpha$ ,  $\beta$  and  $\delta$  with the characteristic peaks indicated with (\*) (**Fig. S2**)
5. PLM images of crystals formed in 0.2  $\mu$ L drop on glass showing crystallisation starting from the edge of the drop resulting in the formation of coffee-ring phenomenon (**Fig. S3**)
6. Evaporation rate of mannitol droplets at different relative humidity values measured with dynamic vapour sorption (**Fig. S4**)
7. Raman spectra from crystals formed in 0.5 to 10  $\mu$ L drops on glass slide showing a mixture of  $\alpha$  and  $\delta$  forms (**Fig. S5**)
8. Raman spectra during drying of 0.2  $\mu$ L drop on (a) glass and (b) aluminium, showing characteristic peaks for alpha form (**Fig. S6**)
9. (a) Images of microlitre drops on glass holder and (b) PXRD patterns from crystalline material formed upon drying showing characteristic peaks for delta (blue starlet) and beta (red starlet) (**Fig. S7**)
10. Light microscopy images of conversion of mannitol crystals formed in a 10  $\mu$ L drop drying on glass slide (arrows indicate areas with noticeable change) (**Fig. S8**)
11. a) SEM images and b) PXRD patterns of spray dried mannitol samples from either water or ethanol and water mixture (**Fig. S9**)
12. DSC thermograms of spray dried mannitol with Eudragit polymer (10 to 90% w/w) (**Fig. S10**)
13. Evaporation of printed drop (1000 drops) on glass (**Video VS1**)
14. Evaporation of printed drop (1000 drops) on aluminium foil (**Video VS2**)
15. Evaporation of printed 100 drops on XRD mesh (**Video VS3**)
16. 10  $\mu$ L droplet on glass slide (**Video VS4**)
17. Evaporation of 0.2  $\mu$ L drop on glass (**Video VS5**)

## **Experimental:**

### **Imaging**

Light microscopy Images of crystals were taken by either Leica Galen III microscope (Leica Microsystems, Wetzlar GmbH) connected to the camera of an iPhone 5s (Apple Inc, USA) using HookUpz Universal adaptor (Carson Optical, USA), or Nikon microphot-FXA light microscope (LM) was used with an Infinity 2 digital camera and capture application software (version 3.7.5). Videos of drying microliter droplets were undertaken using a LeicaADM 2700M microscope connected to a FP82HT Mettler Toledo Instruments heating stage unit and a FP90 Mettler Toledo Instruments central processor unit. Images of 0.2  $\mu$ L drop of mannitol solution (0.5 M) on glass slide were recorded while drying at room temperature The Studio86 Design Capture software (version 4.0.1) was used to record and capture thermal events in real time.

Scanning electron microscopy images were collected on printed samples with a scanning electron microscope (SEM, Quanta 200 FEG, FEI, Netherlands). Samples were prepared by sputter-coating with gold for 3 min (Quorum model Q150).

### **Evaporation rate determination**

Data were recorded with a Sorption Analyser (Q5000 SA, TA Instruments, Waters, USA) with nitrogen as a carrier gas (200mL/min for the humidity chamber and 10mL/min for the balance). The test solution (2, 5 or 10  $\mu$ L) was placed in a metalised quartz pan using a 20  $\mu$ L Gilson pipette and was kept isothermally at 25 °C and a humidity of 0 or 50% RH until constant mass (< 0.01% weight change). The change of mass with time was recorded with a microbalance ( $\leq \pm 0.1\%$  accuracy and 0.01  $\mu$ g resolution) while two precise mass flow controllers controlled the relative humidity by mixing saturated and dry carrier gas. The overall evaporation rate was calculated in  $\mu$ g/s and is reported as mean  $\pm$  standard deviation (SD of three measurements).

### **Contact angle measurement**

Constant contact angle was measured by the sessile drop method using an FTA1000 Analyzer System (First Ten Angstrom, Inc., USA). A droplet (10  $\mu$ L) was placed onto the substrate and the contact angle was calculated with the dedicated software (Fta32 Video, 2.1, First Ten Angstrom, Inc., USA). Measurements were performed in triplicate and values are reported as mean  $\pm$  SD.

**Table S1 Crystallographic Data of D-mannitol polymorphs**

|                                            | <b>Alpha form</b>                              | <b>Beta form</b>                               | <b>Delta form</b> |
|--------------------------------------------|------------------------------------------------|------------------------------------------------|-------------------|
| <b>CSD Refcode</b>                         | DMANTL08                                       | DMANTL09                                       | DMANTL10          |
| <b>Crystal System</b>                      | Orthorhombic                                   | Orthorhombic                                   | Monoclinic        |
| <b>Space Group (Å)</b>                     | P 2 <sub>1</sub> 2 <sub>1</sub> 2 <sub>1</sub> | P 2 <sub>1</sub> 2 <sub>1</sub> 2 <sub>1</sub> | P 2 <sub>1</sub>  |
| <b>a</b>                                   | 4.8653(10)                                     | 5.5381(10)                                     | 4.899(2)          |
| <b>b</b>                                   | 8.873(2)                                       | 8.580(2)                                       | 18.268(6)         |
| <b>c</b>                                   | 18.739(3)                                      | 16.795(5)                                      | 5.043(2)          |
| <b>α</b>                                   | 90                                             | 90                                             | 90                |
| <b>β</b>                                   | 90                                             | 90                                             | 118.39            |
| <b>γ</b>                                   | 90                                             | 90                                             | 90                |
| <b>Cell Volume (Å<sup>3</sup>)</b>         | 808.959                                        | 798.046                                        | 397.034           |
| <b>Z</b>                                   | 4                                              | 4                                              | 2                 |
| <b>ρ<sub>calc</sub> (g/cm<sup>3</sup>)</b> | 1.496                                          | 1.516                                          | 1.524             |
| <b>Polymorphic relation</b>                | Monotropic                                     |                                                |                   |
|                                            |                                                | Enantiotropic                                  |                   |

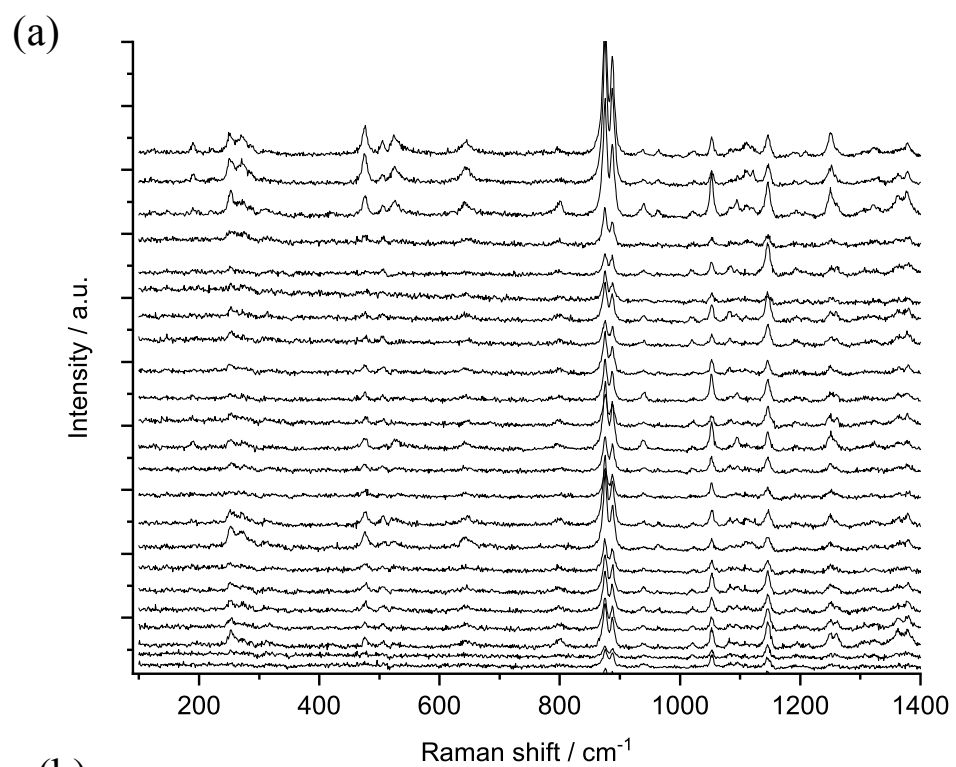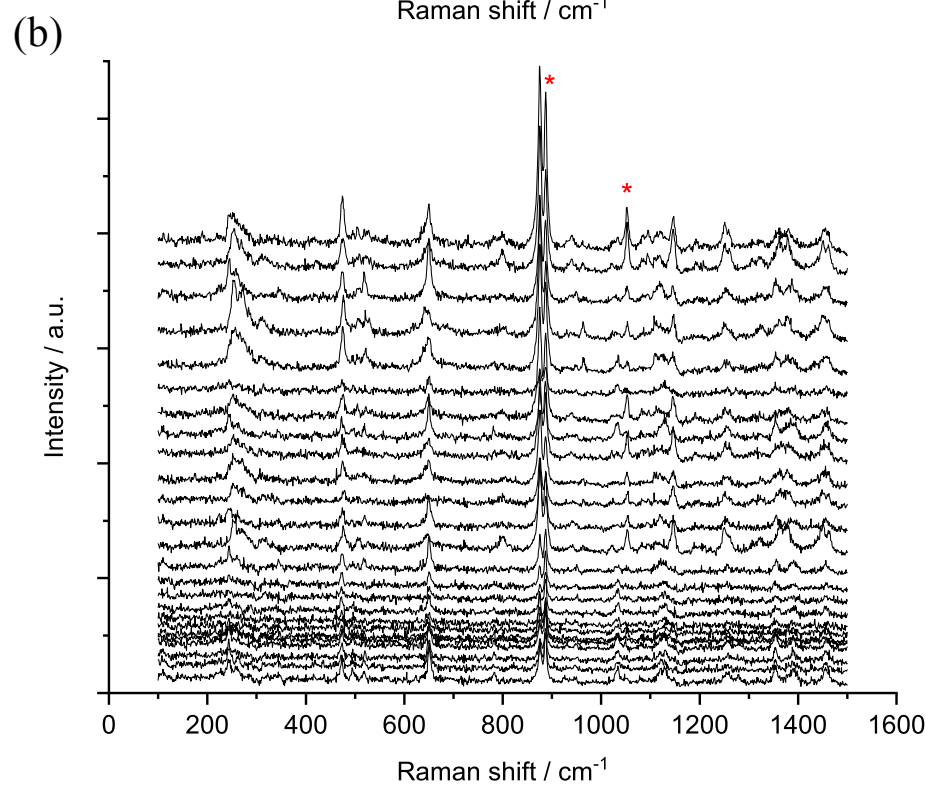

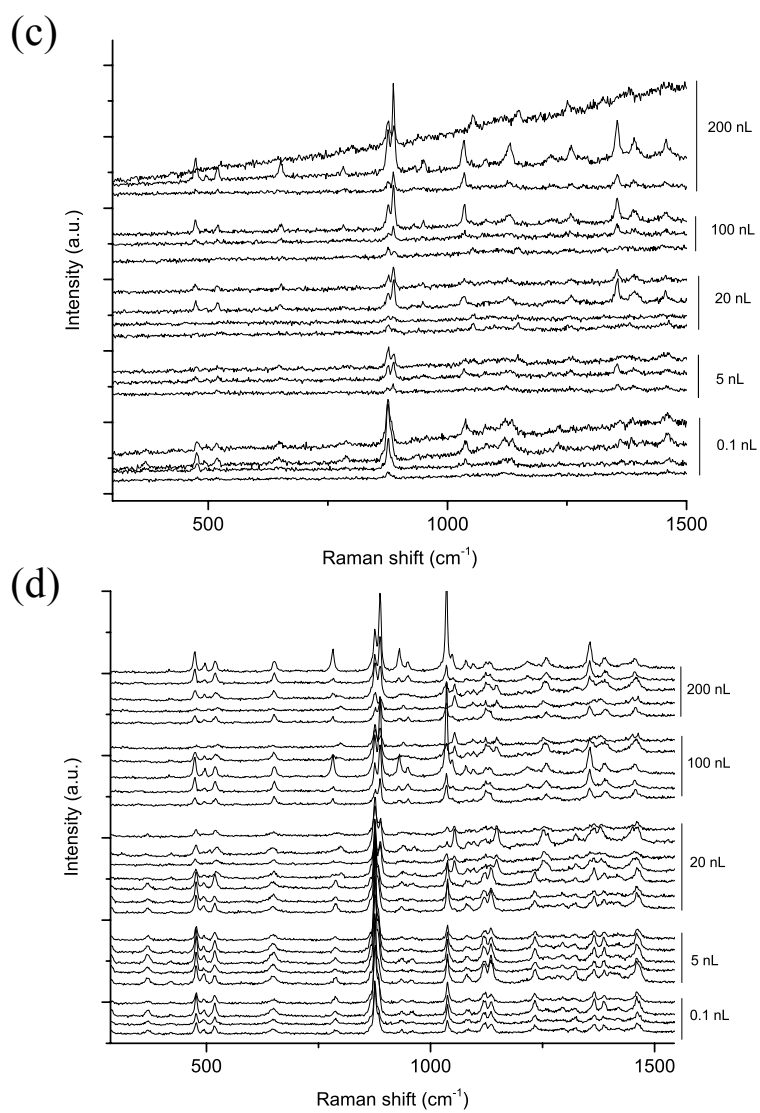

**Fig. S1. Raman spectra from crystals formed in printed drops of 100 nL (a and b) and up to 200 nL (0.2  $\mu\text{L}$ ) (c and d) on glass (a and c) and (b and d) aluminium foil.**

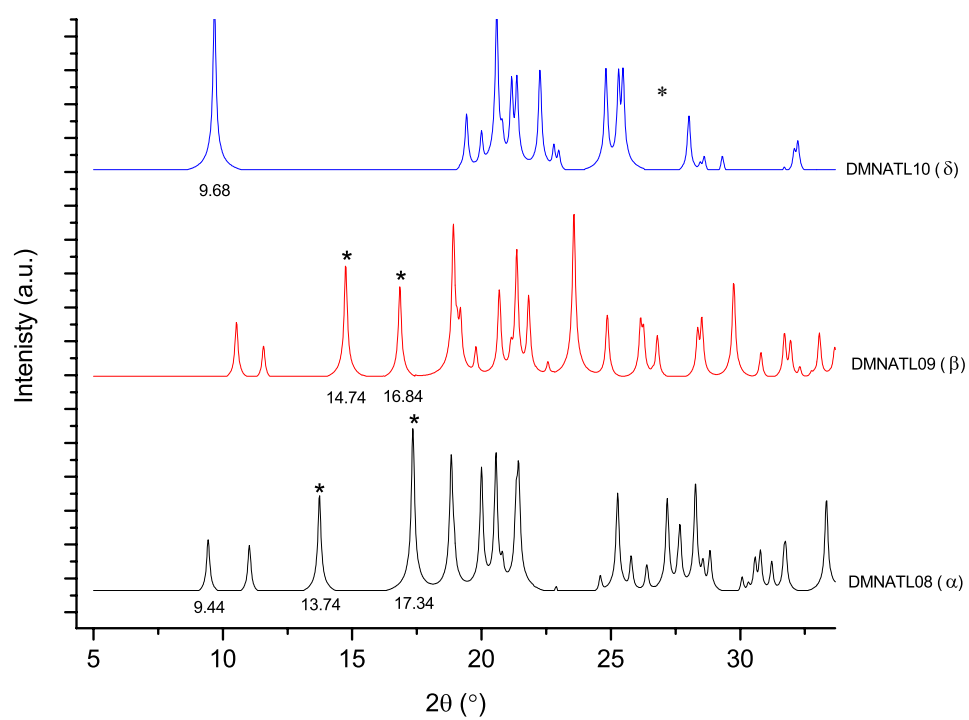

**Fig. S2** Calculated PXRD patterns for d-mannitol forms  $\alpha$ ,  $\beta$  and  $\delta$  with the characteristic peaks indicated with (\*).

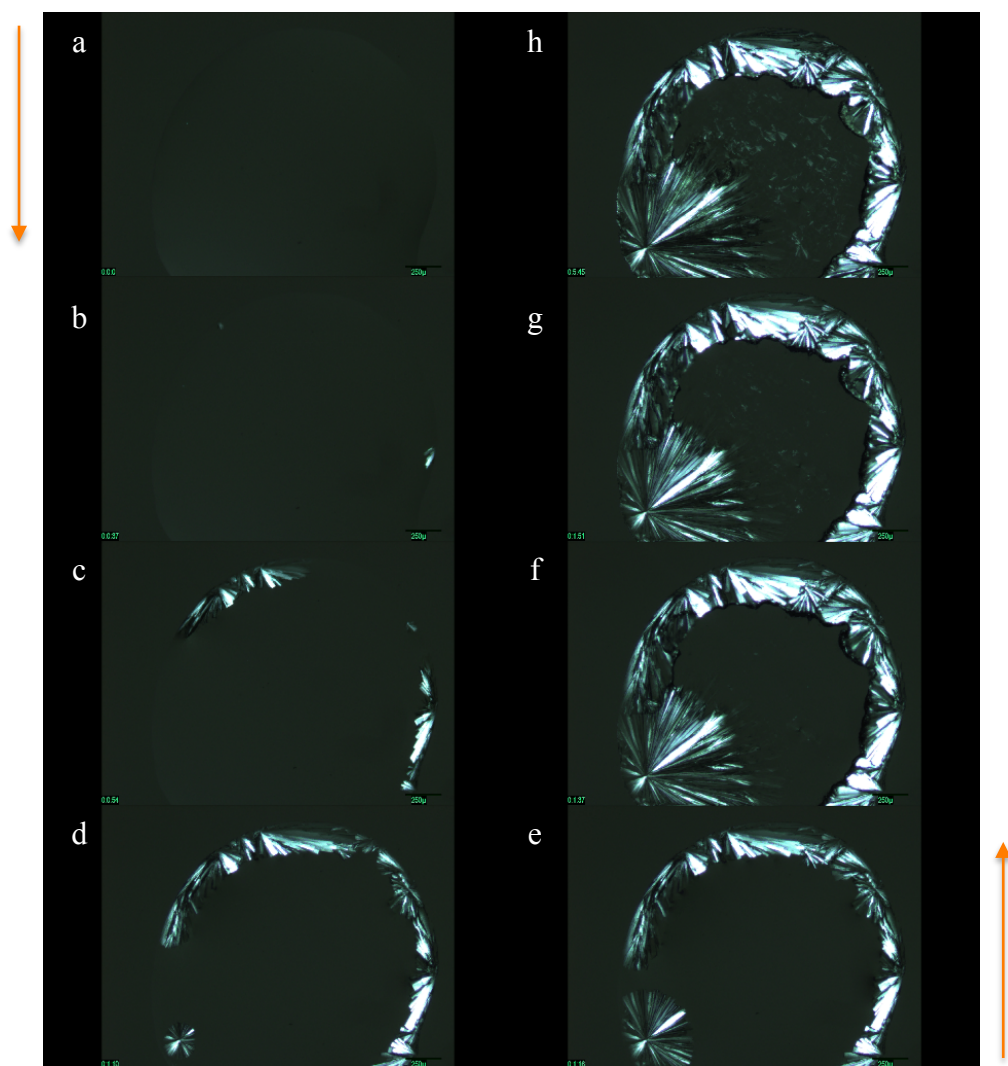

**Fig. S3. PLM images of crystals formed in 0.2  $\mu\text{L}$  drop on glass showing crystallisation starting from the edge of the drop resulting in the formation of coffee-ring phenomenon.**

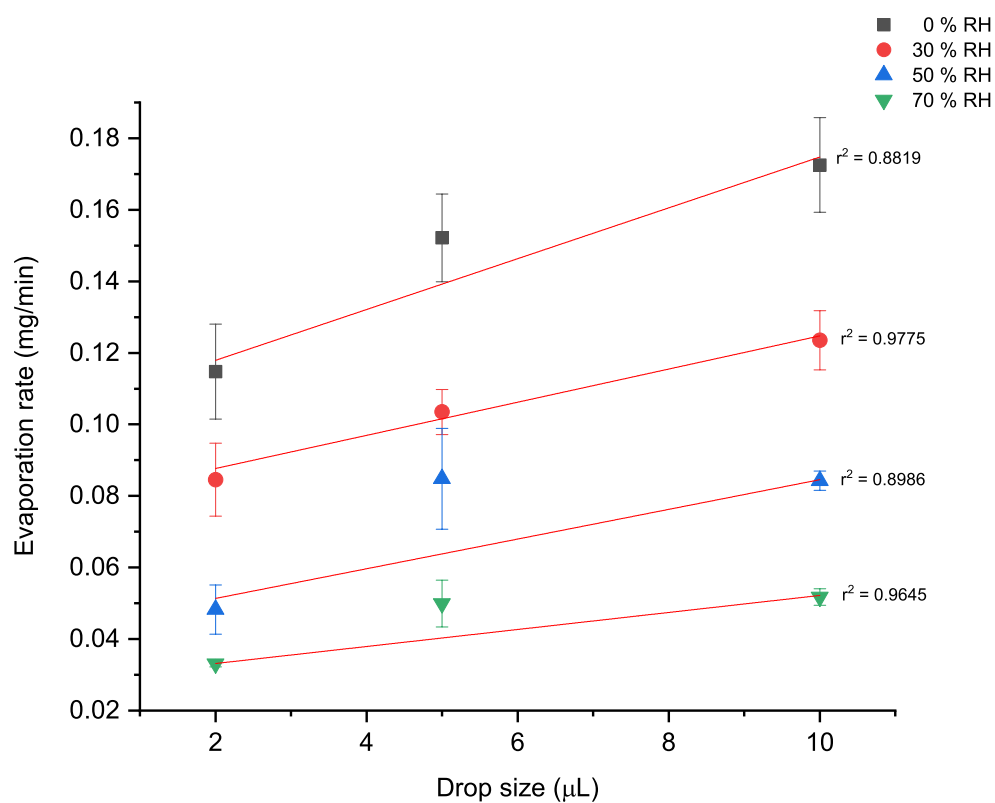

**Fig. S4. Evaporation rate of mannitol droplets at different relative humidity values measured with dynamic vapour sorption.**



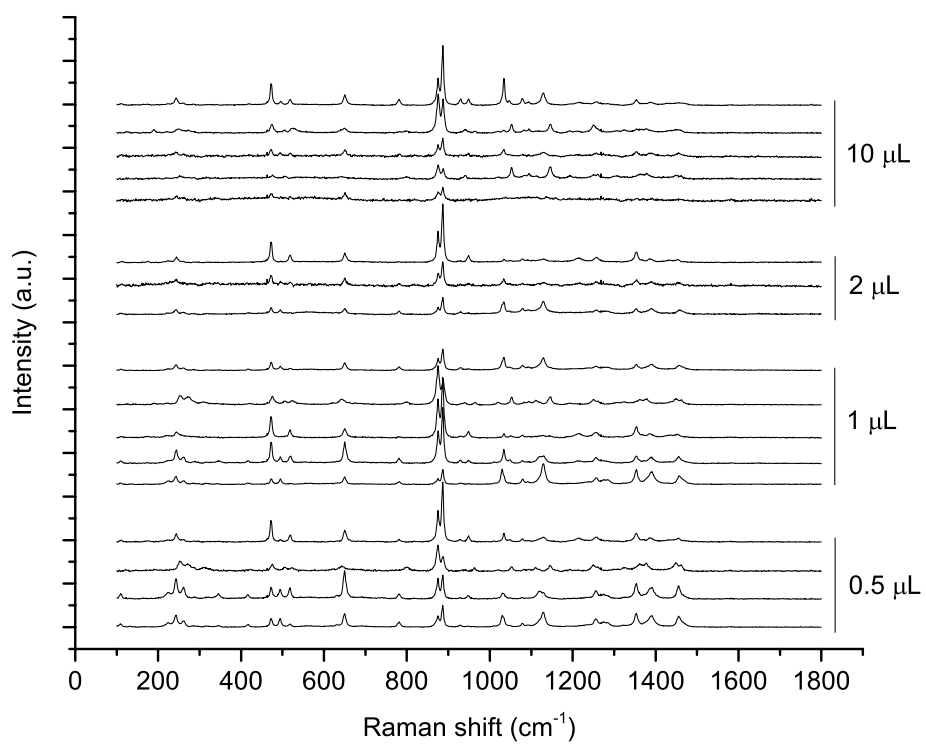

**Fig. S5. Raman spectra from crystals formed in 0.5 to 10  $\mu\text{L}$  drops on glass slide showing a mixture of  $\alpha$  and  $\delta$  forms.**

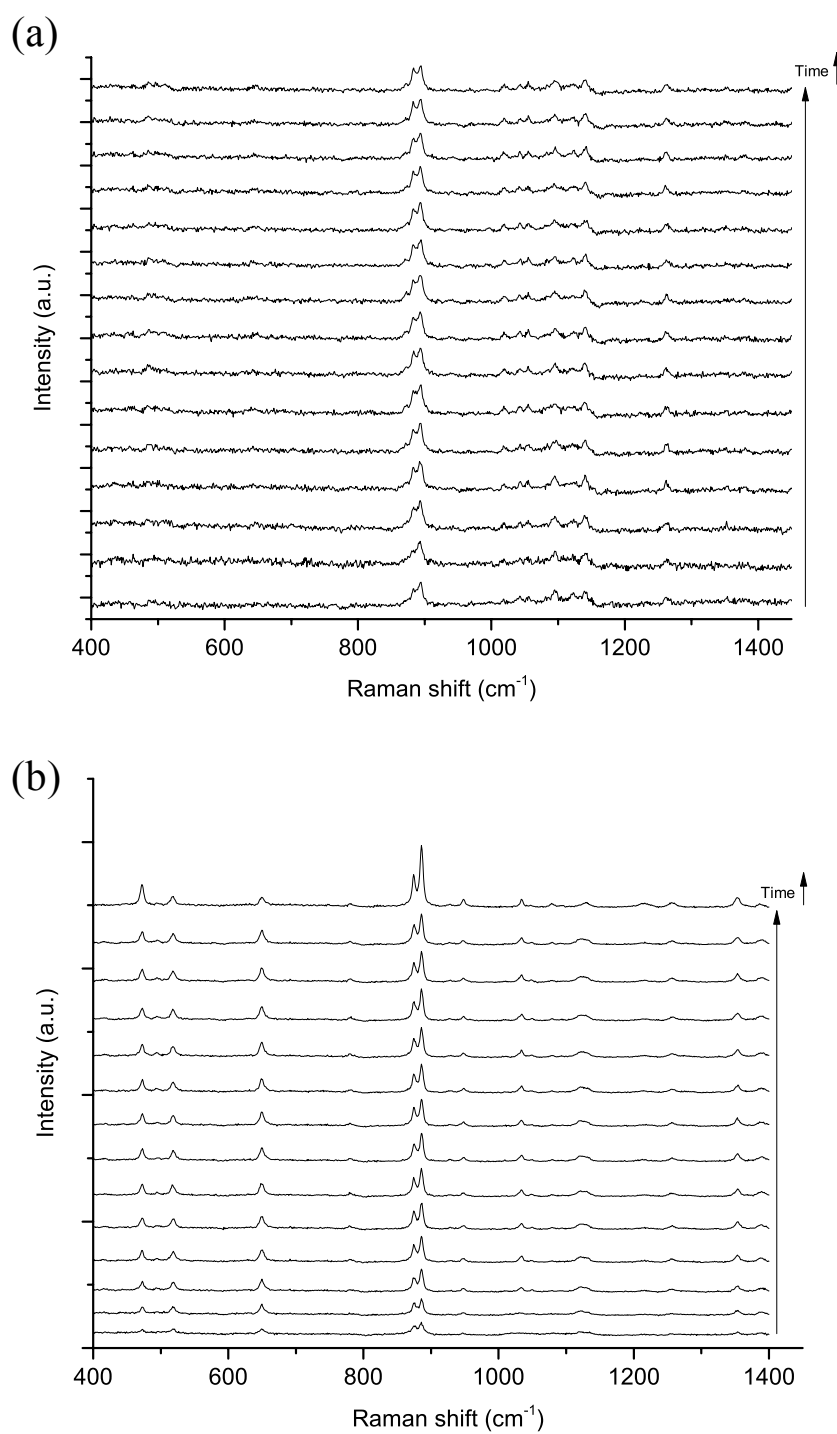

**Fig. S6 Raman spectra during drying of 0.2 uL drop on (a) glass and (b) aluminium, showing characteristic peaks for alpha form.**

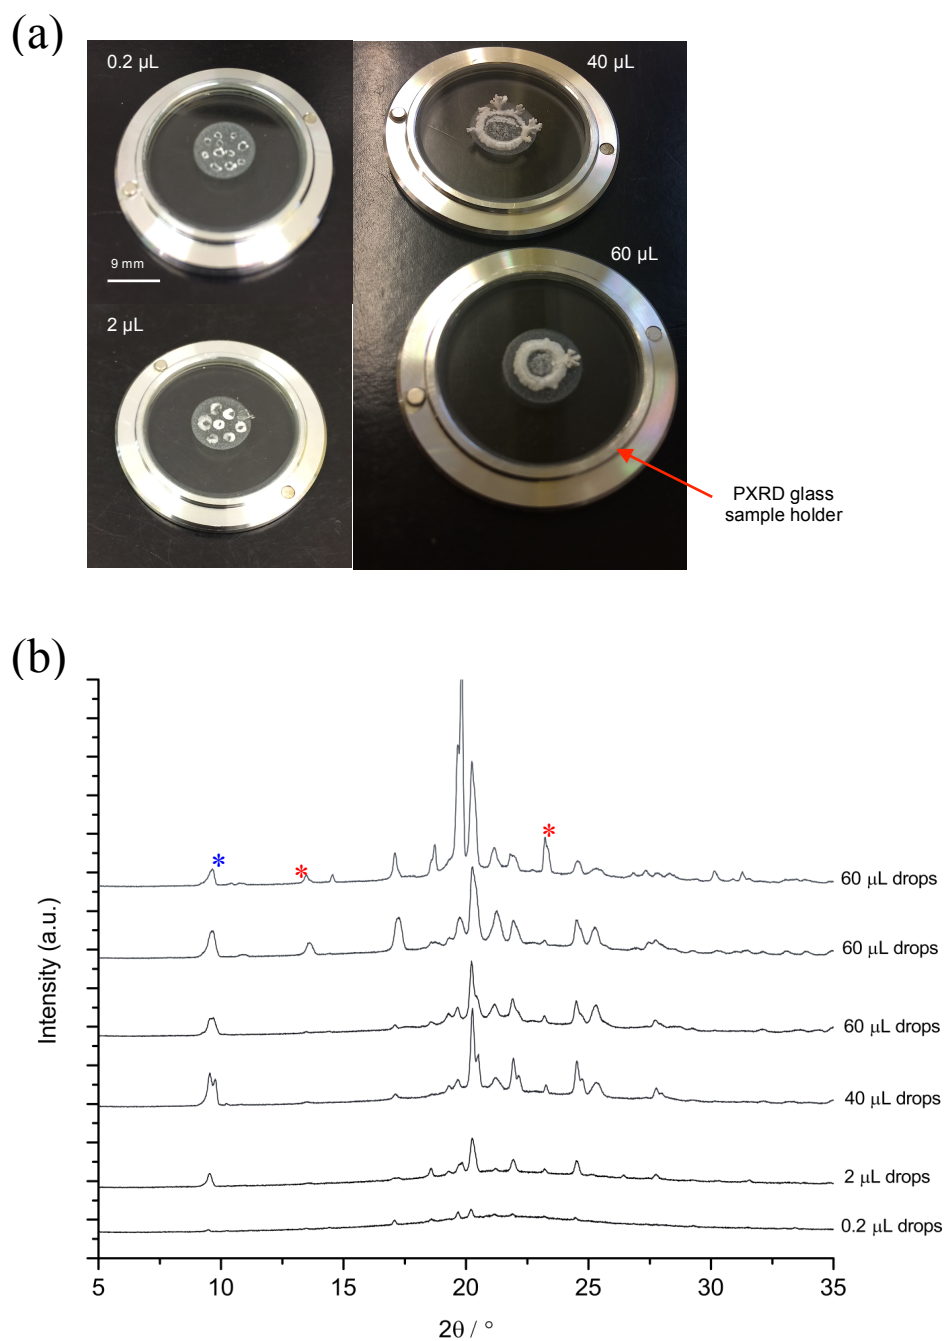

**Fig. S7. (a) Images of microlitre drops on glass holder and (b) PXRD patterns from crystalline material formed upon drying showing characteristic peaks for delta (blue starlet) and beta (red starlet).**

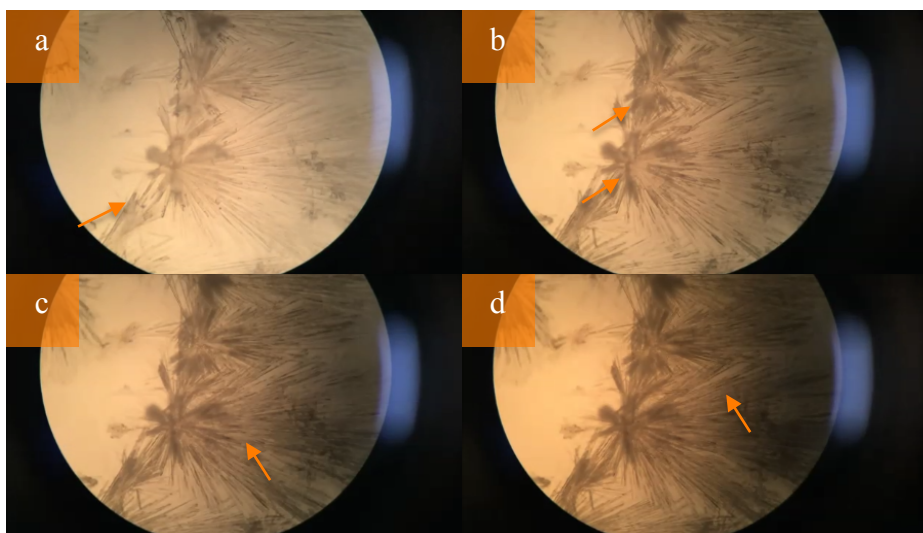

**Fig. S8. Light microscopy images of conversion of mannitol crystals formed in a 10  $\mu$ L drop drying on glass slide (arrows indicate areas with noticeable change).**

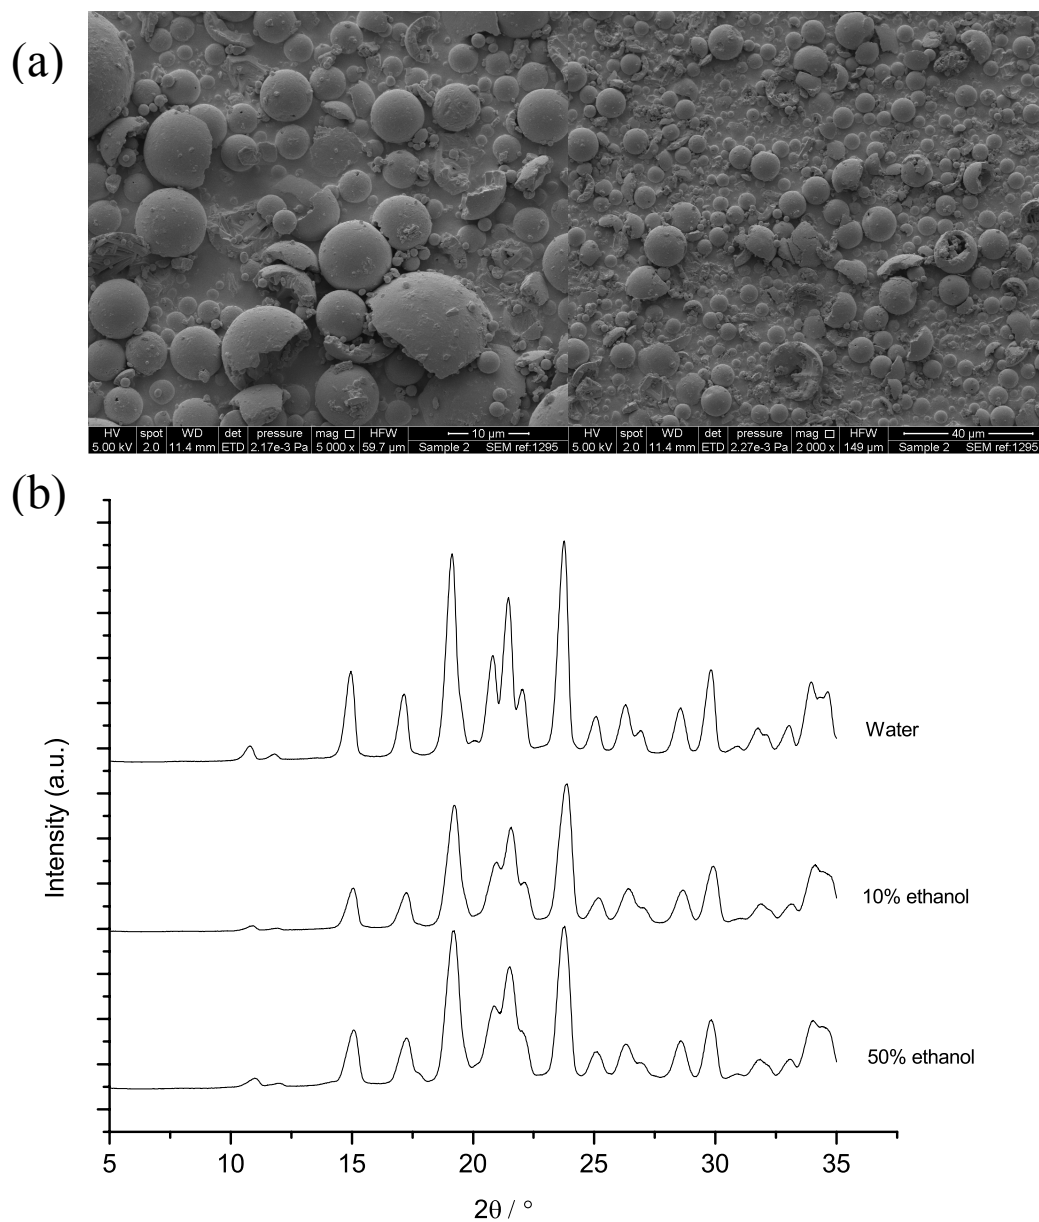

**Fig. S9. a) SEM images and b) PXRD patterns of spray dried mannitol samples from either water or ethanol and water mixture.**

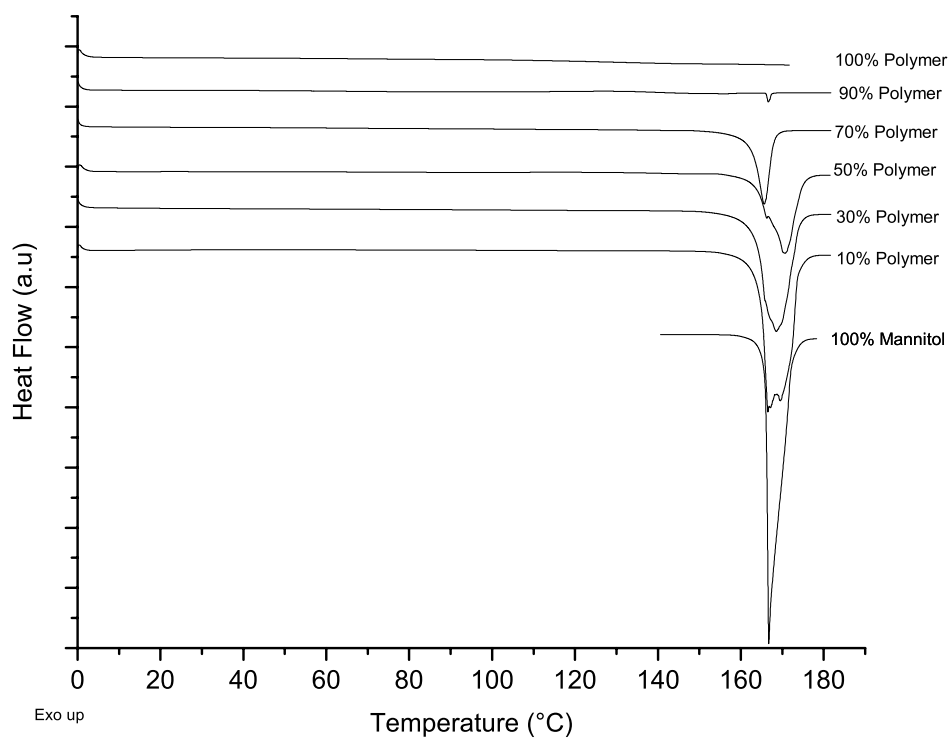

**Fig. S10.** DSC thermograms of spray dried mannitol with Eudragit polymer (10 to 90% w/w)
